# Supplementary material for: Untargeted lipidomic analysis of primary human epidermal melanocytes acutely and chronically exposed to UV radiation
Source: Royal Society of Chemistry journal article supplement (doi:10.1039/c8mo00060c), 2018-04-26
Supplement: c8mo00060c1.zip [file c8mo00060c1.zip]

**Supplementary material**

**Untargeted lipidomic analysis of primary human epidermal melanocytes acutely and chronically exposed to UV radiation**

*Núria Dalmaua, Nathalie Andrieu-Abadieb, Romà Taulera, Carmen Bediaa**

a Department of Environmental Chemistry, Institute of Environmental Assessment

and Water Research (IDAEA-CSIC), c/ Jordi Girona 18-24, 08034 Barcelona, Spain

b INSERM UMR1037, Centre de Recherches en Cancérologie de Toulouse, Toulouse 31037, France

* Corresponding author

E-mail address: [carmen.bedia@idaea.csic.es](mailto:carmen.bedia@idaea.csic.es)

Phone: +34 93 400 61 00 Ext. 1410

**FIGURES**

**Figure S1**

**
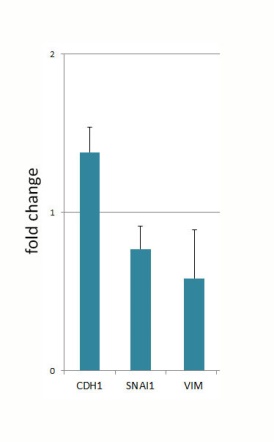
**

**Figure S1. qRT-PCR of EMT related genes on cultured 3-week exposed cells vs non exposed.** No particular EMT induction profile was detected. Results represented the mean ± SE of three independent experiments (n=3) performed in duplicate.

**Figure S2**


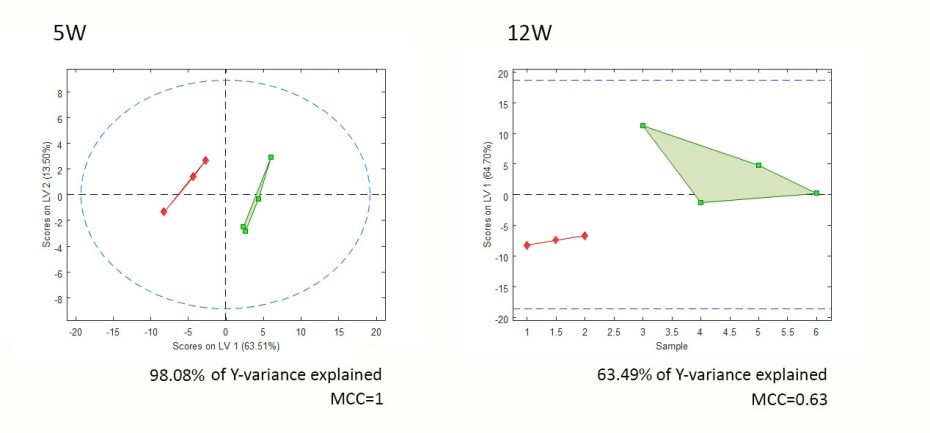


**Figure S2. PLS-DA analysis of the lipidomic data at 5W and 12W.** UPLC-TOF positive and negative ionization data of melanocyte lipid extracts was processed using the ROIMCR strategy. At each endpoint studied a matrix containing the areas for each MCR component in the irradiated and non-irradiated samples was used to build the two-class PLS-DA models.
